# Supplementary material
Source: PubMed Central journal article supplement (PMC9419402)
Supplement: 12913_2022_8451_MOESM1_ESM.pdf [file 12913_2022_8451_MOESM1_ESM.pdf]

## Overview of included projects.

| Nr. | Project title                                                                                                                  | Year           | Empirical setting                                                                         | Involved Stakeholders                                                           |
|-----|--------------------------------------------------------------------------------------------------------------------------------|----------------|-------------------------------------------------------------------------------------------|---------------------------------------------------------------------------------|
| 1.  | QUASER Quality and Safety in European Hospitals                                                                                | 2010-2013      | Hospitals                                                                                 | Healthcare personnel<br>Managers                                                |
| 2.  | Next-of-kin involvement in regulatory investigation of adverse events that caused patient death                                | Finalized 2019 | Norwegian regulatory body<br>One county Governor's office in Norway                       | Next-of-kin<br>Regulatory investigators                                         |
| 3.  | SAFE-LEAD                                                                                                                      | 2016-2021      | Nursing homes<br>Homecare services                                                        | Managers<br>Healthcare personnel                                                |
| 4.  | Patient participation in transitional care of older patients                                                                   | Finalized 2016 | Hospital admission, discharge, transitional care                                          | Healthcare personnel (ambulance workers, nurses, and doctors)<br>Older patients |
| 5.  | Simulation-based telecare training for home healthcare professionals                                                           | Finalized 2019 | Homecare services                                                                         | Homecare professionals                                                          |
| 6.  | Safe work practices in interdisciplinary surgical teamwork                                                                     | Finalized 2013 | Hospital Surgical teamwork                                                                | Healthcare professionals                                                        |
| 7.  | Transitional care of the elderly from a resilience perspective                                                                 | Finalized 2015 | Hospital, nursing homes, homecare services                                                | Healthcare professionals, elderly patients                                      |
| 8.  | Safe clinical practices for patients hospitalised in a suicidal crisis                                                         | Finalized 2020 | Psychiatric care in a Norwegian hospital                                                  | Suicidal patients<br>Healthcare professionals                                   |
| 9.  | Next-of-kin involvement in hospital cancer care                                                                                | Finalized 2021 | Cancer department in two hospitals. Managers and staff.                                   | Next-of-kin, Healthcare professionals, Managers                                 |
| 10. | Exploring hospital readmissions from the primary healthcare service                                                            | Finalized 2020 | The interface between primary and secondary care. Hospitals, nursing homes.               | Physicians, nurses and nursing home managers.                                   |
| 11. | Impact of active implementation of the Norwegian Musculoskeletal guideline on the use of non-traumatic musculoskeletal imaging | Finalized 2020 | Two municipalities in Norway. Hospital and general practitioners                          | GPs, radiologists, radiological fellows                                         |
| 12. | Safe use of telecare for older adults in homecare services                                                                     | Ongoing        | Six community homecare services in two Norwegian municipalities.                          | Homecare professionals (nurses and occupational therapists)                     |
| 13. | Exploring links between resilience and macro-level development of healthcare regulation                                        | Finalized 2021 | Employees at the ministry, the directorate, and the Norwegian board of health supervision | Actors at the macro level at Governmental regulatory bodies.                    |
| 14. | A human factor approach to medication administration in nursing homes                                                          | Finalized 2020 | Nursing homes                                                                             | Healthcare personnel in nursing homes involved in medication administration     |
